# Supplementary material for: Competitive effects of the macroalga Caulerpa taxifolia on key physiological processes in the scleractinian coral Turbinaria peltata under thermal stress
Source: PeerJ journal article supplement (doi:10.7717/peerj.16646), 2023-12-14
Supplement: Data_in_Brief_template.xlsx [file Data_in_Brief_template.xlsx]

## Sheet: Environment factors
Day	temperature							Day	pH							Day	Salinity
	control	co-occurrence	direct contact	control	co-occurrence	direct contact			control	co-occurrence	direct contact	control	co-occurrence	direct contact			control	co-occurrence	direct contact	control	co-occurrence	direct contact
1	27	27	27	29.9	29.8	29.8		1	8	8	8	8	8	8		1	33	33	33	32.8	33	33
2	27	27	27	29.9	29.8	29.9		2	8	8	8	8.1	8	8		2	33	33	33.1	32.9	33	33
3	27	27	27	29.8	30	29.9		3	8	8	8	8	8	8		3	33	33	33.1	33	33	33
4	27.2	27	27	29.9	30	30.1		4	8	8	8	8	8	8		4	32.9	33	33.1	33	33	33
5	27	27	27	30	30.1	30		5	8	8	8	8	8	8.1		5	32.9	33	33	32.8	33	33
6	27	27	27	30.1	30.1	30		6	8	8	8	8	8	8.1		6	32.9	33	33	32.8	33	33
7	27	27	27	30.1	30	30		7	8	8	8	8	8	8.1		7	32.9	33	33	32.9	33	32.8
8	27.1	27.2	27	30	30	30		8	8	8.1	8	8	8	8		8	33	32.7	33	32.8	33	33
9	27	27	27	30	30	30		9	8	8.1	8	8	8	8		9	33	32.7	33	32.8	33	33
10	27	27	27	30	30	30		10	8	8.1	8	8.1	8	8		10	33	32.7	33.1	33	33	33.1
11	27.1	27	27	30	30	30		11	8	8.1	8	8	8	8		11	33	32.7	33.1	33	32.7	33.1
12	27.2	27	26.9	30.1	30	30		12	8.1	8.1	8	8.1	8	8		12	32.9	33	33.1	32.7	32.7	33.1
13	27	27	27	30	30	30		13	8	8	8	8.1	8	8		13	33	33	33	32.9	33	33
14	27	27	27	30.1	30.1	30		14	8	8	8	8	8.1	8		14	33.1	33	33	32.9	33	33
15	27	27	27	30	30	29.8		15	8	8	8	8	8.1	8		15	33	33	33	32.9	33	33
16	27.2	27	27.2	30	29.8	30		16	8.1	8	8	8	8.1	8		16	33	33	33	32.9	33	33
17	27.1	26.7	27	30.1	29.8	29.9		17	8	8	8	8	8.1	8		17	33	33.1	33	33	32.8	33
18	27.05	26.9	27	30	30	30		18	8.1	8	8	8	8.1	8		18	33.1	33.1	33	33	32.8	33
19	27.1	27	27	30	30	30		19	8.1	8	8	8	8	8.1		19	33	33.1	33	33	32.8	33.1
20	27	27	27.3	29.9	30	30		20	8	8	8	8	8	8.1		20	32.8	33	32.8	33	33	33.1
21	27	27	27	30	30	30		21	8	8	8.1	8	8	8.1		21	32.8	33	32.8	33	33	33.1
22	27	27	27	30	30	30		22	8.1	8	8.1	8	8	8		22	32.8	33	32.8	32.8	33	33
23	27	27	27	30	30	30		23	8.1	8	8.1	8	8	8		23	32.9	33	32.8	32.7	33	33
24	27.2	26.8	27	30.1	30	30		24	8	8	8	8	8	8		24	32.9	33	33	32.9	33	33
25	27	26.7	26.7	30	30	30.2		25	8	8	8	8	8	8		25	32.8	33	33	33	33.2	33
26	27	26.9	26.9	30.1	30	30		26	8	8.1	8	8	8	8		26	32.9	33	33.1	33	33.2	33
27	27	27	27	30	30.2	30		27	8	8.1	8	8	8	8		27	32.9	33	33.1	33.1	33.2	32.9
28	26.8	27	27	30	30	30		28	8	8.1	8	8	8	8		28	32.8	33	33.1	33.2	33.2	32.9

## Sheet: Coral
Variable	Endosymbiont density×106 (cell cm-2)
	27℃			Mean±sd	30℃			Mean±sd
Coral	1.46	1.17	1.27	1.3±0.14	0.74	0.65	0.78	0.72±0.07
Co-occurrence	1.08	0.85	0.94	0.94±0.08	0.84	0.89	1.01	0.91±0.09
Direct contact	0.76	1.1	0.81	0.89± 0.18	0.83	1.12	0.95	0.96±0.15
	Chl a (µg cm-2)
	27℃			Mean±sd	30℃			Mean±sd
Coral	18.6	17.2	15.6	17.1±1.5	8.05	4.24	9.27	7.19±2.6
Co-occurrence	14.25	15.2	11.05	13.5±2.2	14.89	12.61	11.12	12.88±1.9
Direct contact	8.32	8.99	12	9.77±1.9	8.39	14.46	10.39	11.08±3.1
	Feeding Rate (ind ployp-1h-1)
	27℃			Mean±sd	30℃			Mean±sd
Coral	32.15	27.34	28.8	29.43±2.5	18.04	20.1	20.84	19.66±1.45
Co-occurrence	24.33	24.59	24.04	24.32±0.28	19.2	18.84	18.64	18.92±0.34
Direct contact	24.98	27.73	21.3	24.67±3.22	11.9	13.98	12.6	12.83±1.05
	Protein (mg cm-2)
	27℃			Mean±sd	30℃			Mean±sd
Coral	5.81	3.61	4.77	4.73±1.1	4.02	4.11	4.03	4.05±0.05
Co-occurrence	3.06	3.03	2.81	2.97±0.14	3.53	3.15	3.2	3.29±0.21
Direct contact	2.7	2.87	1.66	2.41±0.65	0.94	1.2	1.54	1.23±0.3
	Growth Rate (mg cm-2 d-1)
	27℃			Mean±sd	30℃			Mean±sd
Coral	4.3	5.39	2.59	4.09±1.41	0.74	0.52	0.79	0.68±0.14
Co-occurrence	1.86	2.48	0.85	1.73±0.82	0.92	0.31	1.17	0.8±0.44
Direct contact	1.57	2.22	0.43	1.41±0.9	1.06	0.48	0.17	0.57±0.45
	SOD(U mgprot-1)
	27℃			Mean±sd	30℃			Mean±sd
Coral	104.6	94.9	120.7	106.7±13	160.1	177.3	228.2	188.5±35.4
Co-occurrence	183.4	207.1	200.9	197.1±12.3	230.2	177.7	179	195.6±30
Direct contact	307.3	279.3	277.9	288.1±16.6	285.9	382.6	394.5	354.3±59.56
	CAT(U mgprot-1)
	27℃			Mean±sd	30℃			Mean±sd
Coral	4.99	5.11	3.02	4.37±1.17	34.28	27.85	31.57	31.23±3.2
Co-occurrence	29.91	27	12.57	23.16±9.29	26.96	17.2	32.6	25.59±7.79
Direct contact	15.62	23.99	31.11	23.57±7.75	41.62	56.61	58.06	52.10±9.1

## Sheet: p-values
Endosymbiont density							Chlorophyll A							Growth rate
Tukey's multiple comparisons test	Mean Diff.	95.00% CI of diff.	Significant?	Summary	Adjusted P Value		Tukey's multiple comparisons test	Mean Diff.	95.00% CI of diff.	Significant?	Summary	Adjusted P Value		Tukey's multiple comparisons test	Mean Diff.	95.00% CI of diff.	Significant?	Summary	Adjusted P Value
27℃							27℃							27℃
Control vs. Co-occurrence	0.3669	0.03164 to 0.7021	Yes	*	0.0337		Control vs. Co-occurrence	3.638	-2.742 to 10.02	No	ns	0.2888		Control vs. Co-occurrence	2.367	1.577 to 3.157	Yes	****	<0.0001
Control vs. Direct contact	0.414	0.07878 to 0.7493	Yes	*	0.0189		Control vs. Direct contact	7.384	1.003 to 13.76	Yes	*	0.026		Control vs. Direct contact	2.689	1.899 to 3.479	Yes	****	<0.0001
Co-occurrence vs. Direct contact	0.04715	-0.2881 to 0.3824	No	ns	0.9157		Co-occurrence vs. Direct contact	3.746	-2.635 to 10.13	No	ns	0.2711		Co-occurrence vs. Direct contact	0.3219	-0.4679 to 1.112	No	ns	0.5047
30℃							30℃							30℃
Control vs. Co-occurrence	-0.1879	-0.5231 to 0.1474	No	ns	0.2995		Control vs. Co-occurrence	-5.691	-12.07 to 0.6894	No	ns	0.0787		Control vs. Co-occurrence	-0.1214	-0.9112 to 0.6684	No	ns	0.9004
Control vs. Direct contact	-0.2411	-0.5764 to 0.09412	No	ns	0.1612		Control vs. Direct contact	-3.894	-10.27 to 2.486	No	ns	0.2481		Control vs. Direct contact	0.113	-0.6768 to 0.9028	No	ns	0.9129
Co-occurrence vs. Direct contact	-0.05325	-0.3885 to 0.2820	No	ns	0.8941		Co-occurrence vs. Direct contact	1.797	-4.583 to 8.177	No	ns	0.7107		Co-occurrence vs. Direct contact	0.2345	-0.5553 to 1.024	No	ns	0.6855
Sidak's multiple comparisons test	Mean Diff.	95.00% CI of diff.	Significant?	Summary	Adjusted P Value		Sidak's multiple comparisons test	Mean Diff.	95.00% CI of diff.	Significant?	Summary	Adjusted P Value		Sidak's multiple comparisons test	Mean Diff.	95.00% CI of diff.	Significant?	Summary	Adjusted P Value
27℃ - 30℃							27℃ - 30℃							27℃ - 30℃
Control	0.5783	0.2934 to 0.8631	Yes	***	0.0003		Control	9.954	4.824 to 15.08	Yes	***	0.0005		Control	3.411	1.589 to 5.233	Yes	***	0.0007
Co-occurrence	0.02351	-0.2613 to 0.3084	No	ns	0.9945		Co-occurrence	0.6247	-4.505 to 5.754	No	ns	0.9828		Co-occurrence	0.9228	-0.8994 to 2.745	No	ns	0.4606
Direct contact	-0.07688	-0.3617 to 0.2080	No	ns	0.8503		Direct contact	-1.324	-6.454 to 3.806	No	ns	0.866		Direct contact	0.8353	-0.9869 to 2.657	No	ns	0.5402
Protein							Feeding Rate							SOD
Tukey's multiple comparisons test	Mean Diff.	95.00% CI of diff.	Significant?	Summary	Adjusted P Value		Tukey's multiple comparisons test	Mean Diff.	95.00% CI of diff.	Significant?	Summary	Adjusted P Value		Tukey's multiple comparisons test	Mean Diff.	95.00% CI of diff.	Significant?	Summary	Adjusted P Value
27℃							27℃							27℃
Control vs. Co-occurrence	1.764	0.4622 to 3.066	Yes	*	0.0117		Control vs. Co-occurrence	5.108	0.7722 to 9.445	Yes	*	0.0238		Control vs. Co-occurrence	-90.36	-172.5 to -8.220	Yes	*	0.0329
Control vs. Direct contact	2.32	1.018 to 3.622	Yes	**	0.0024		Control vs. Direct contact	4.758	0.4222 to 9.095	Yes	*	0.0333		Control vs. Direct contact	-181.4	-263.6 to -99.27	Yes	***	0.0006
Co-occurrence vs. Direct contact	0.5558	-0.7464 to 1.858	No	ns	0.4753		Co-occurrence vs. Direct contact	-0.35	-4.686 to 3.986	No	ns	0.9712		Co-occurrence vs. Direct contact	-91.05	-173.2 to -8.908	Yes	*	0.0318
30℃							30℃							30℃
Control vs. Co-occurrence	0.7567	-0.5455 to 2.059	No	ns	0.2773		Control vs. Co-occurrence	0.7347	-3.601 to 5.071	No	ns	0.8806		Control vs. Co-occurrence	-7.069	-89.21 to 75.07	No	ns	0.9673
Control vs. Direct contact	2.825	1.523 to 4.127	Yes	***	0.0007		Control vs. Direct contact	6.825	2.489 to 11.16	Yes	**	0.005		Control vs. Direct contact	-165.8	-247.9 to -83.65	Yes	**	0.0011
Co-occurrence vs. Direct contact	2.068	0.7662 to 3.371	Yes	**	0.0048		Co-occurrence vs. Direct contact	6.091	1.754 to 10.43	Yes	**	0.0096		Co-occurrence vs. Direct contact	-158.7	-240.9 to -76.58	Yes	**	0.0014
Sidak's multiple comparisons test	Mean Diff.	95.00% CI of diff.	Significant?	Summary	Adjusted P Value		Sidak's multiple comparisons test	Mean Diff.	95.00% CI of diff.	Significant?	Summary	Adjusted P Value		Sidak's multiple comparisons test	Mean Diff.	95.00% CI of diff.	Significant?	Summary	Adjusted P Value
27℃ - 30℃							27℃ - 30℃							27℃ - 30℃
Control	0.6815	-1.338 to 2.701	No	ns	0.5854		Control	9.77	5.651 to 13.89	Yes	****	<0.0001		Control	-81.8	-155.1 to -8.513	Yes	*	0.0277
Co-occurrence	-0.3262	-2.345 to 1.693	No	ns	0.9142		Co-occurrence	5.397	1.277 to 9.516	Yes	*	0.0103		Co-occurrence	1.492	-71.80 to 74.78	No	ns	>0.9999
Direct contact	1.186	-0.8329 to 3.206	No	ns	0.2253		Direct contact	11.84	7.717 to 15.96	Yes	****	<0.0001		Direct contact	-66.18	-139.5 to 7.110	No	ns	0.0812
CAT
Tukey's multiple comparisons test	Mean Diff.	95.00% CI of diff.	Significant?	Summary	Adjusted P Value
27℃
Control vs. Co-occurrence	-18.79	-37.23 to -0.3471	Yes	*	0.0462
Control vs. Direct contact	-19.2	-37.64 to -0.7587	Yes	*	0.0421
Co-occurrence vs. Direct contact	-0.4116	-18.85 to 18.03	No	ns	0.9978
30℃
Control vs. Co-occurrence	5.648	-12.79 to 24.09	No	ns	0.6698
Control vs. Direct contact	-20.86	-39.30 to -2.422	Yes	*	0.0289
Co-occurrence vs. Direct contact	-26.51	-44.95 to -8.070	Yes	**	0.0085
Sidak's multiple comparisons test	Mean Diff.	95.00% CI of diff.	Significant?	Summary	Adjusted P Value
27℃ - 30℃
Control	-26.86	-42.90 to -10.82	Yes	**	0.0017
Co-occurrence	-2.426	-18.47 to 13.61	No	ns	0.968
Direct contact	-28.52	-44.56 to -12.48	Yes	**	0.001
